# Supplementary material for: Expression of TMBIM6 in Cancers: The Involvement of Sp1 and PKC
Source: PubMed Central journal article supplement (PMC6678130; doi:10.3390/cancers11070974), 2019-07-11
Supplement: cancers-11-00974-s001.pdf [file cancers-11-00974-s001.pdf]

Supplementary Materials

## Expression of TMBIM6 in Cancers: The Involvement of Sp1 and PKC

Raghu Patil Junjappa, Hyun-Kyoung Kim, Seong Yeol Park, Kashi Raj Bhattarai, Kyung-Woon Kim, Jae-Won Soh, Hyung-Ryong Kim and Han-Jung Chae

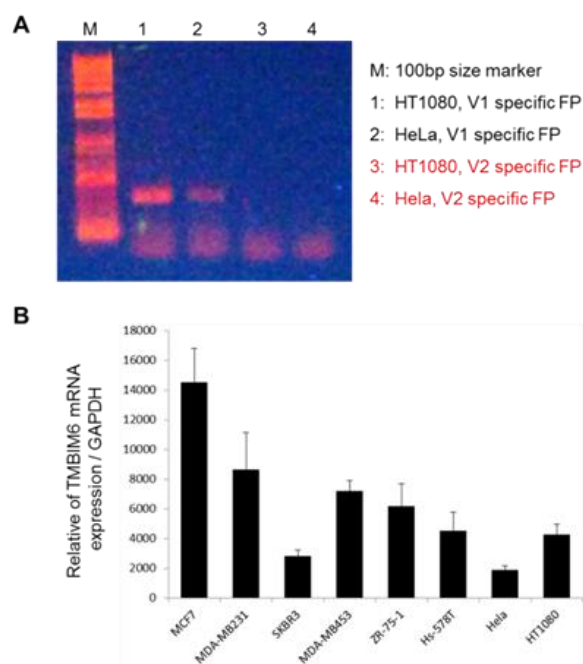

**Figure S1.** TMBIM6 expression pattern. (A) Analysis of the expression pattern of human TMBIM6 transcriptional variants 1 and 2 in HT1080 and HeLa cells. PCR was done with the 5' UTR-specific forward primer of each variant with a common reverse primer. (B) TMBIM6 mRNA expression pattern in various cancer cell lines.

-2430 TAGGTGTACCGGACTCTAAAAGAACTTGTGTATAATGCTATTCTATACAAGGTATGTAGCCAGGAA  
-2359 ATGACCAACCTGATGTGTATTGACCCATCTGAGCCTCCCATGACCACAGTTTTTAAATAAGATTAAGG  
-2288 ACTGAGGACTGGTGGGAGGACTCATAAATGATACGAGTAAAGTGTAGCCAAAAAAGAAAA  
-2222 GGGGTGCCAAACAAGTACCTTGAAGTTTGATGCCTGTGCTGCATTAATAGCAATAAGTTAGGAAGGG  
-2152 GATGTGGCTCTTTTAGTTGGGAAAAAGGCTATATGACCGAAAAATAAGTACATTGTGCATGAATGAGGACTG  
-2081 TGTGAAAATGAATGGGATACTGGCTTGTGTCTATTAGGCCACTTGGATAAAAAATGAAAAGGATCCAGT  
-2010 CCACCTTCAGAAAAGGAAAAATGGCTCTTCTGTACTAAGGGACAATGTAACCCCTTAGAGCTAGTAATA  
-1940 ACCAATCCCCTTGATCCTCGCTGGAAAAAAGGGGAGCGTGTGACCTTAGGAATCGACAGGGCTGGAC  
-1872 TGGATCGTCGAGTAAATATCTTAGTTCGAGGAGAAGTCTGTGGAAAAATTAACCTTACCAATGTGCTGCA  
-1799 CATAGATGATCAGAGGCAAGTAGTCGAAGATATAGTAAAGACATGACGAACTGGCACATGTGCCTGT  
-1730 ACAAGTGTGACACGGATTGACCCCTGAAGCTATGTTAAAAATGGTCCAGTGTAGGAGGATTTAAAAAC  
-1659 TCTTATAATAAAAAATTATAGTAGTAATAGCCTGCTTACTGATCCCTTATTACTATCTGACTCAATCAATGGTAA  
-1582 AAGGTTTCATCACTACTCTAGTTCACCAAGATGCTCAGCACAAAGTACTACATAAATCACTATCGATCTGT  
-1509 CATGCAAGGAAGACATAGGTAGTGAAGATGAAGGTGAGAACTCCCAATAAAAAATGAGTGAGAGTCT  
-1442 CAAAGTGGGGGAATAAGGGAGGAGACCACCCCTCATATGTCTTATGCCCAATTCTGCCTCCAAAGAA  
-1373 AGAAGTAGTAAAACTAAAAGGCAGAAATGAATCCACAAGCAGACAGCCAGGCACCAACCCCT  
-1309 GGGCCTCGTAGTAAAGATCGACCCCTGACCTAATCGGTTATGTTATCTATAGATTACAGACATTGTATAGA  
-1237 AAAGCACTGTGAAAATCCCTGTCTGTTCTGATCTAATACCGGTGCATGCTGTCTCAATCGATCACTACCT  
-1164 CTC AAGCGGATCCCTT TAGAGTTGTGAGGCCCTTAAAAGGACAGGAATGTCTACTAGGGAGCTCAGC  
-1095 TCTTGAGACAGGAGTCTTGGCCGATCTCTGGCGGAATAAACCGCTTCTGCTTTAACTCGGTGTCTGAG  
-1024 GGGTTTTGTCTGGGCTTGCTCTGCTACACTACAGCAAAAATAGGTTGATTATAGAAAAATTAACTTTTT  
-974 GGTTTTTTTGGACGGGCTCGCTCTGCTCAGGCTGGAGTGCAGTGGCACCATCTCGGCTCACTGCAACC  
-878 TTCACCTCCAGGTC AAGCAATTCTCTGCCTCAGCCTCCCGAGTAGTTGGGATTACAGGCACACGCCA  
-809 CCACGCCAGCTAATTTTTAAATTTTAAATAGAGATGGGGTTTACCATGTAGCCAGGCTGGTCTCAAAC  
-737 TCCTGGCCTCAAGTGATCTGCCACCTCAGCCTCCCAAAGTGTCTGGGATTACAGCGTAAAGCACCAC  
-669 GCCCAGCCGAAAATAACTTCTATTAATGCATACCTGGGTTTGCCTACTGAGAATCATAACCTGGATATT  
-598 TGTATCTTACTGAAAAGAAGTCTTCTTCTTCCAGAAAGTGGTTTCTAAATCTGGTTTTCTCTCGGAAT  
-523 CTGCTATTCTCTCGCATACTAGAGAAATCGAAGTGTTTTCAAAGGTGCTCTGAAGCTTACGCTCCA  
-451 CTAGTTTACAGTAAATCGCCCTTGCAGGGCGCTTTTTTTTTTTTTTAAATGTGTTCTGAAICGCTTCC  
-377 CCCTTAACTGTCATGACAAGACTAAAGCCAGAAATCCCAAGACTGCAGCGTACCCCTTACAAGCCG  
-308 TCGGGCTGTCCCGGGCGGGCCGCCATTTTCACTTCTCCACTAGAGGCAGCAGCCACCGTGAC  
-241 CCTGGCTTACTACGGTAAGAAAGCGGAGACCTTTGCTTCGAGCGGTTGGTGGCCAGTAGTCTTGATC  
-172 GACAAAGCTCAGGCCCTCTGAACTAAGCAGCCGCTGTTATGACAGTACAGCCAATGGAAGGCAGG  
-107 AGTGCGGCCAACGGCCAATGAGGACTGGTCTTAAAGCGGACCACAGGGCGGGGTTTCCCTCGAGA  
-43 GGCGAACGCCGGTAAAAGATCGGGAGCGGAAGTGGGGAGTCAAGAGCACATCCGGTGTAGA  
AGCGCTGGTA +30 +1

**Figure S2.** Sequence of 5'-flanking region of the human TMBIM6 gene selected for the promoter assay. The pGL3-P1 full length construct was generated with this sequence.

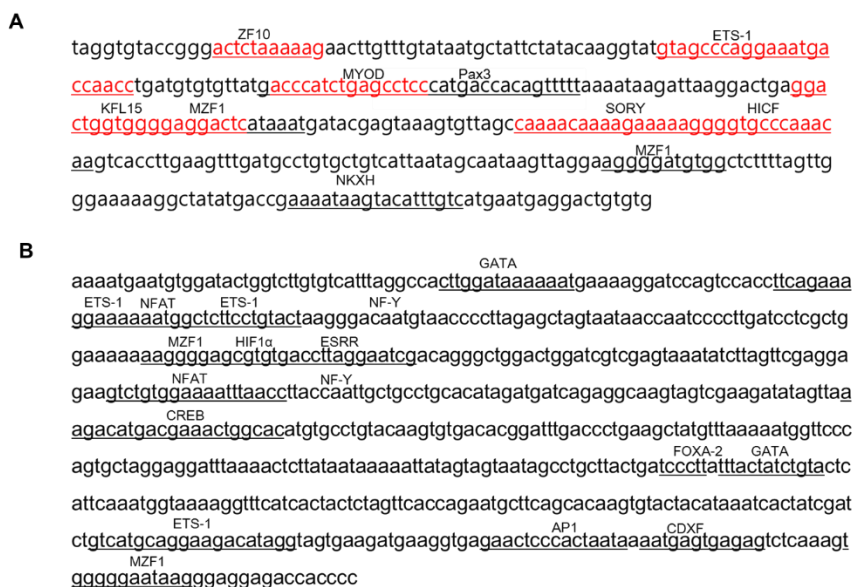

**Figure S3.** Putative transcription factor binding sites present in the P1 specific region (-2460/-2171) (A) and P2 specific region (-2171/-1439) (B) of the TMBIM6 promoter region.

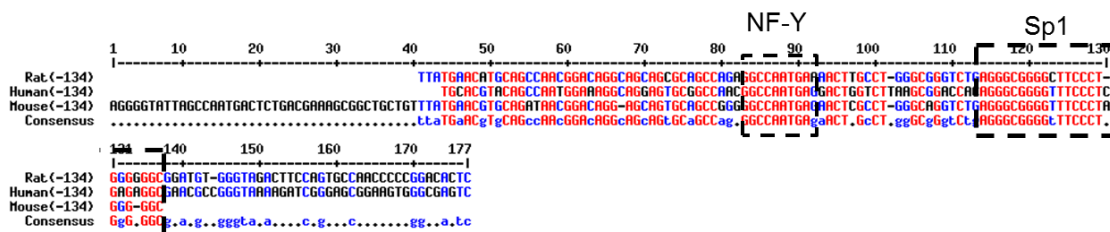

**Figure S4.** The human TMBIM6 core promoter P9 sequence (-133/+30) was aligned with the same upstream length as the transcription site or 5' cDNA end sequence of mouse and rat TMBIM6 available in the NCBI database or UCSC. Demarcated site shows the conserved CAAT box and proximal GC box (Sp1 binding site).

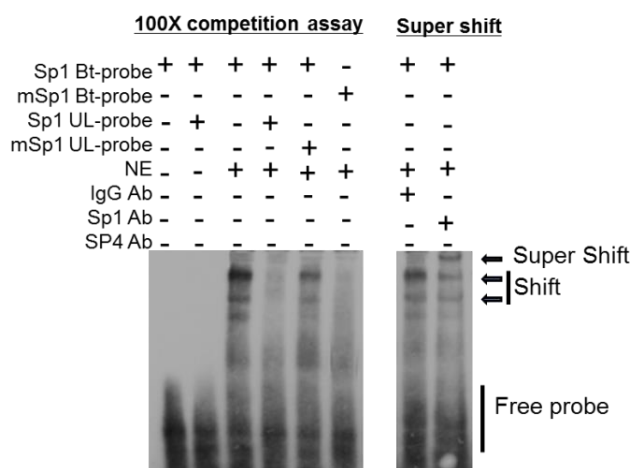

**Figure S5.** EMSA assay showing distal Sp1 site binding to the human TMBIM6 promoter. Nuclear extract was prepared from HT1080 cells. Double-stranded 35-bp oligonucleotide probe specific to distal Sp1 site (-103/-70) generated and labeled with biotin. The labeled Sp1-p probe was incubated alone (lane 1), with unlabeled probe (lane 2), with the NE (lane 3), with the NE and 200-fold excess amount of unlabeled homologous probe (lane 4), with 200-fold excess mutant probe (lane 5), and with mutant-labeled probe that failed to form a complex with the NE (lane 6). DNA-protein complexes that formed are indicated (S). In lanes 7-9, the super shift assay was performed by pre-incubating the NE with probe for 20 min on ice before adding the specific antibody. Then, the specific probe was added and further incubated for 20 min on ice, with normal IgG as the negative control in lane 7 and anti-Sp1 monoclonal antibody in lanes 8, respectively. The super shift is indicated as SS.

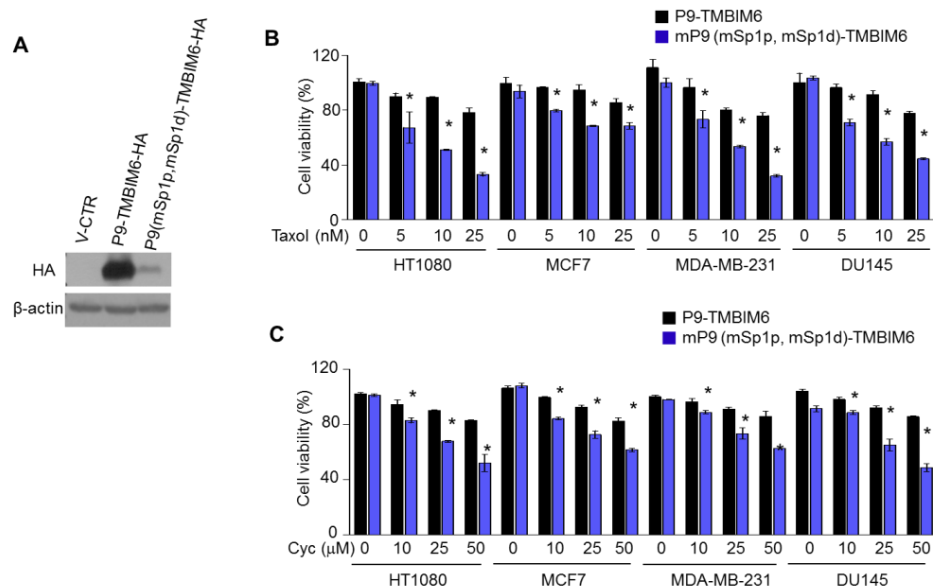

**Figure S6.** Sp1-dependent TMBIM6 expression protects against stress. (A) Immunoblot showing the Sp1 dependent TMBIM6-HA expression in P9-TMBIM6-HA, P9(mSp1p, mSp1d)-TMBIM6-HA and empty vector transfected HT1080 cells. (B,C) Cell viability percentage comparing to untreated cells, Indicated cell lines were treated with different concentration of paclitaxel and cyclophosphamide for 24 h, and cell viability was assed. The results are the mean  $\pm$  SD from  $n = 3$  independent experiments.

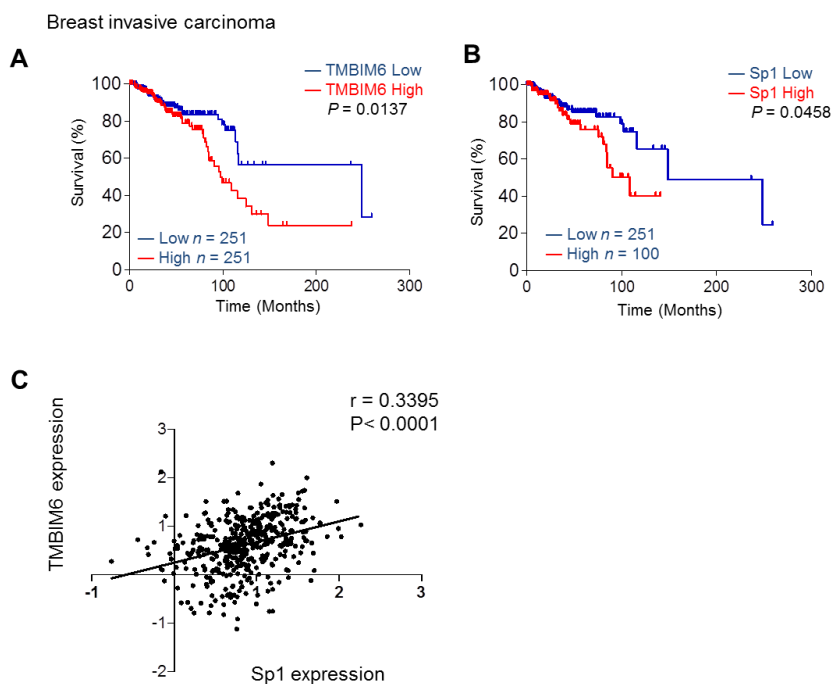

**Figure S7.** Overall survival analysis of breast cancer patients and RNA-Seq analysis. (A,B) Kaplan-Meier curves showing the overall survival analysis in patients with high and low expression of TMBIM6 and Sp1 using OncoLnc from TCGA database.  $p$  value with log-rank analysis. (C) Pearson's correlation coefficient revealed a positive correlation between TMBIM6 and Sp1 expression in breast cancer patient sample from RNA-seq data, TCGA database.

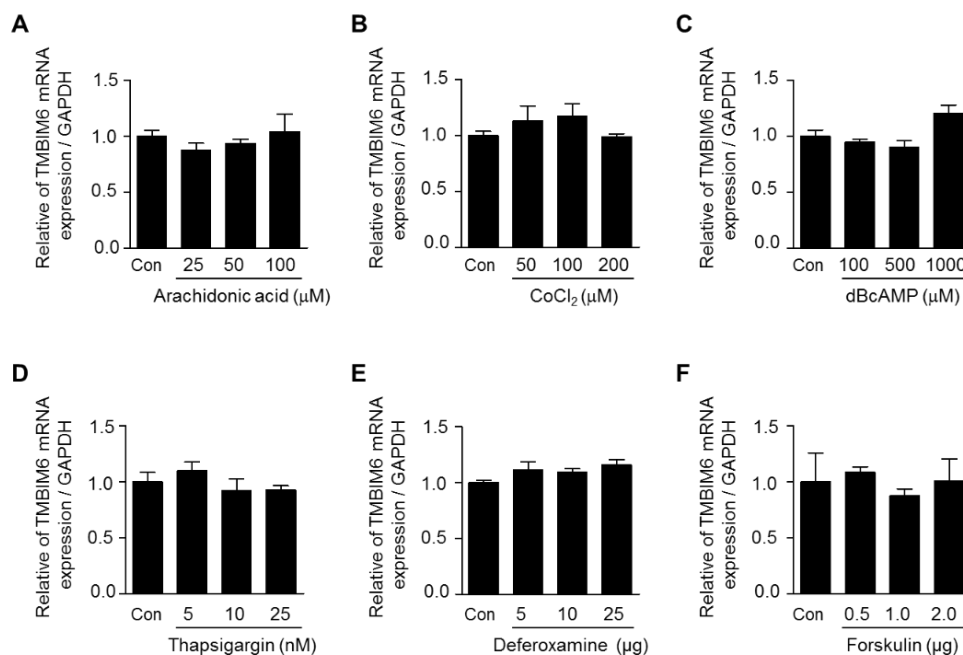

**Figure S8.** Induction of endogenous TMBIM6 mRNA expression. HT1080 cells were treated with various chemical inducers at different concentrations for 6 h, and the mRNA level was quantified by qRT-PCR. Relative TMBIM6 mRNA expression level was measured in HT1080 cells treated with arachidonic acid (A), cobalt chloride (CoCl<sub>2</sub>) (B), dB cyclic AMP (C), thapsigargin (D), deferoxamine (E) and forskulin (F) at indicated concentration. Error bars, mean  $\pm$  SD.

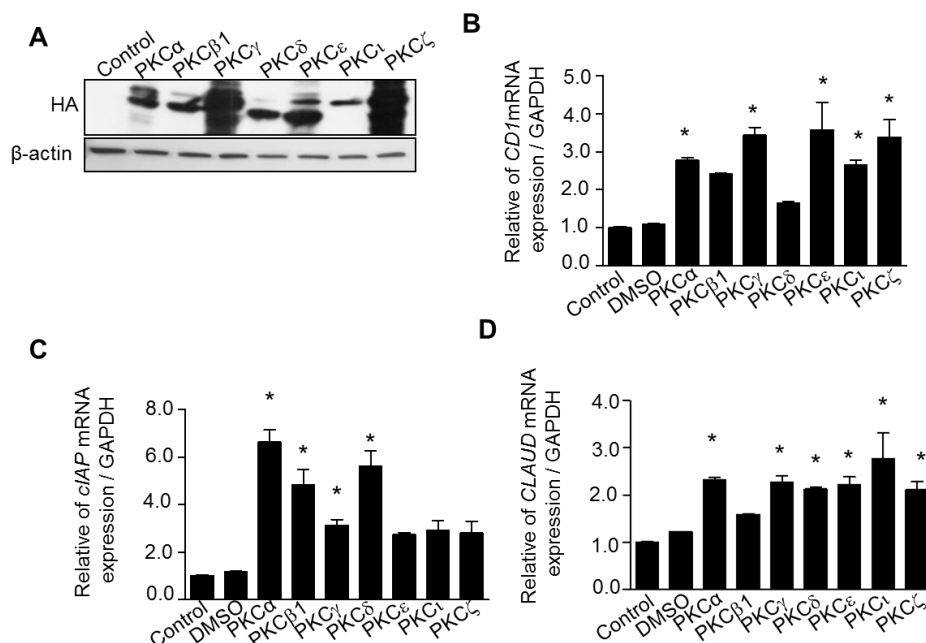

**Figure S9.** Expression and activity analysis of catalytically active-mutants of PKC isoforms. (A) Western blot showing the expression of catalytically active mutants of PKC isoforms, HA tagged mutant isoforms were transfected to HT1080 cells, after 24 h, cells were harvested and analysed for the HA expression. (B-D) Relative mRNA expressions of CD1, cIAP and CLAUDIN as positive controls for the PKC isoforms activity analysis. '\*' indicate significant differences from the control.



Supplementary: RAW DATA

EMSA:

Figure 4A: HT1080 nuclear extract

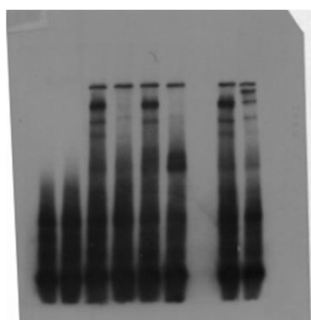

Figure 4B: MCF7 nuclear extract

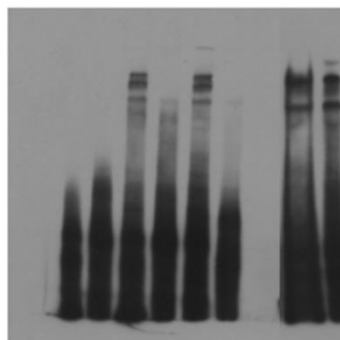

Supplementary figure 4: HT1080 nuclear extract with distal SP1 probes

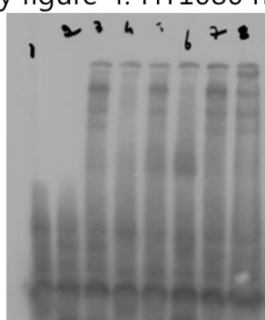

Western blots: Raw data

Figure: 5A

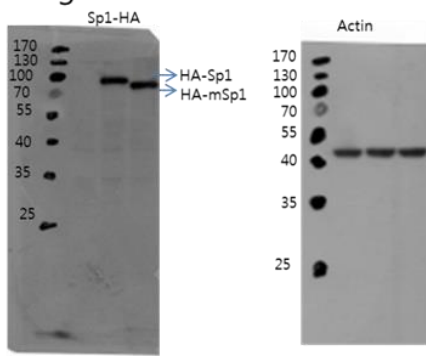

Figure: 5D

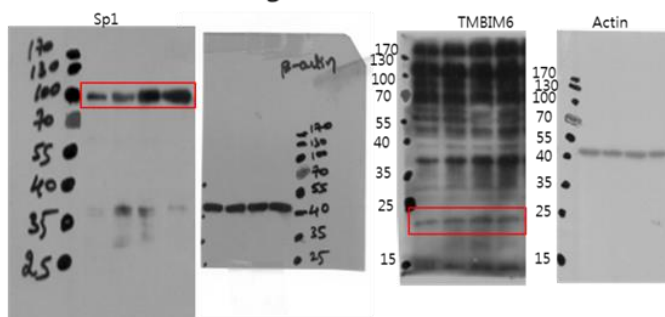

Figure: 5G

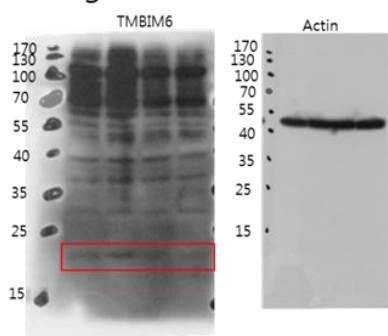

Figure: 6F

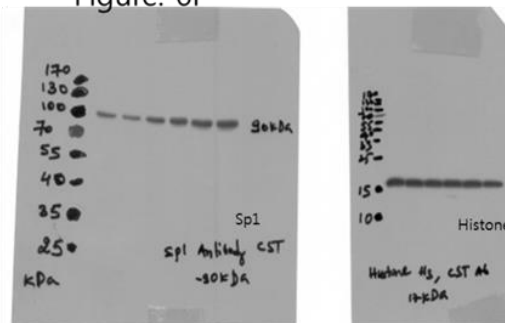

Raw data; RT-PCR for SP1, TMBIM6 and GAPDH

Figure:5E

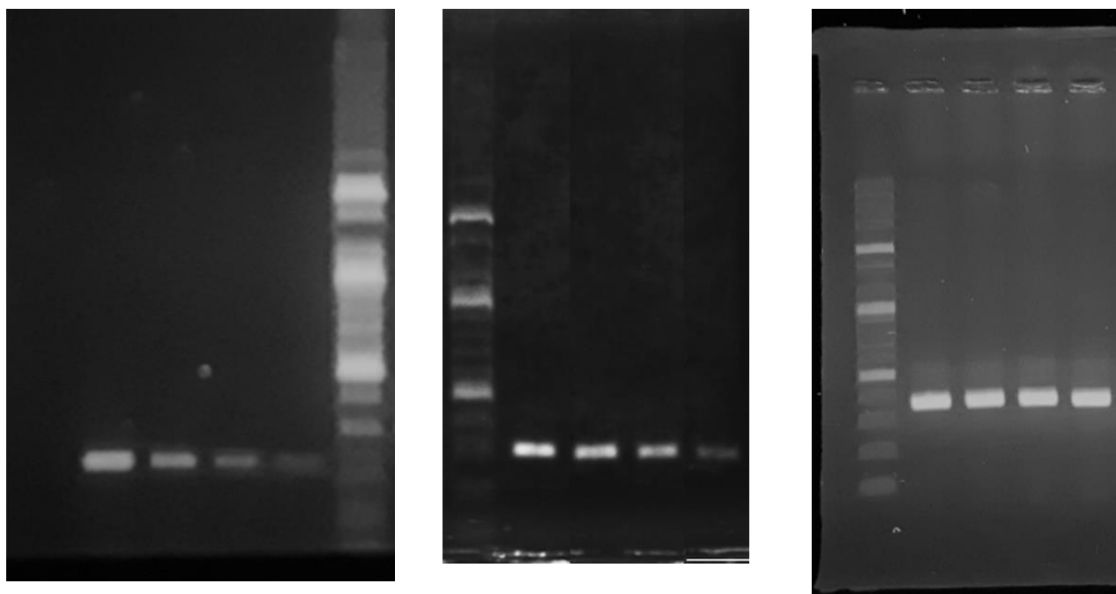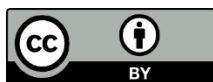

© 2019 by the authors. Licensee MDPI, Basel, Switzerland. This article is an open access article distributed under the terms and conditions of the Creative Commons Attribution (CC BY) license (<http://creativecommons.org/licenses/by/4.0/>).
